# Supplementary material for: Opal Actigraphy (Activity and Sleep) Measures Compared to ActiGraph: A Validation Study
Source: MDPI journal article supplement (doi:10.3390/s23042296), 2023-02-18
Supplement: s1 [file s1]

**Table S1.** Activity and sleep measures average across 7 days of all participants for the four sensors.

| Metric                                      | Opal versus<br>ActiGraph GT9X<br>(non-dominant arm) |                              | Actigraph GT3X versus<br>ActiGraph GT9X<br>(dominant arm) |                              |
|---------------------------------------------|-----------------------------------------------------|------------------------------|-----------------------------------------------------------|------------------------------|
|                                             | Opal                                                | ActiGraphGT9X                | ActiGraphGT3X                                             | ActiGraphGT9X                |
| <b>Activity measures<br/>(Freedson 98)</b>  |                                                     |                              |                                                           |                              |
| Total counts (#)                            | 1,134,078.00<br>(347,558.80)                        | 1,157,470.00<br>(350,752.00) | 1,294,464.00<br>(431,727.20)                              | 1,280,843.00<br>(418,138.40) |
| Light activity(min)                         | 735.95<br>(81.05)                                   | 732.65<br>(81.29)            | 704.23<br>(90.17)                                         | 707.19<br>(91.50)            |
| Moderate activity<br>(min)                  | 482.43<br>(62.15)                                   | 479.66<br>(62.50)            | 478.71<br>(77.15)                                         | 477.04<br>(75.70)            |
| Vigorous activity<br>(min)                  | 211.71<br>(67.63)                                   | 217.07<br>(68.49)            | 243.23<br>(84.54)                                         | 242.58<br>(83.78)            |
| Very vigorous<br>activity (min)             | 7.41<br>(7.58)                                      | 8.02<br>(8.12)               | 11.27<br>(10.92)                                          | 10.70<br>(9.74)              |
| Sedentary activity<br>(min)                 | 2.50<br>(6.78)                                      | 2.61<br>(6.92)               | 2.56<br>(6.91)                                            | 2.49<br>(6.91)               |
| <b>Activity measures<br/>(Freedson VM3)</b> | <b>Opal</b>                                         | <b>ActiGraphGT9X</b>         | <b>ActiGraphGT3X</b>                                      | <b>ActiGraphGT9X</b>         |
| Total counts (#)                            | 2,168,544.00<br>(556,343.80)                        | 2,213,815.00<br>(568,297.20) | 2,412,999.00<br>(645,513.40)                              | 2,386,703.00<br>(633,010.50) |
| Light activity(min)                         | 1123.21<br>(81.15)                                  | 1117.31<br>(82.48)           | 1093.30<br>(94.40)                                        | 1095.46<br>(93.76)           |
| Moderate activity<br>(min)                  | 243.95<br>(57.96)                                   | 247.38<br>(59.77)            | 243.49<br>(62.22)                                         | 244.79<br>(63.06)            |
| Vigorous activity<br>(min)                  | 64.19<br>(37.74)                                    | 65.34<br>(38.64)             | 91.01<br>(47.09)                                          | 88.41<br>(45.97)             |
| Very vigorous<br>activity (min)             | 8.64<br>(10.65)                                     | 9.97<br>(11.80)              | 12.20<br>(12.58)                                          | 11.34<br>(11.88)             |
| <b>Sleep measures</b>                       | <b>Opal</b>                                         | <b>ActiGraphGT9X</b>         | <b>ActiGraphGT3X</b>                                      | <b>ActiGraphGT9X</b>         |
| Total sleep time (min)                      | 354.02<br>(111.72)                                  | 346.71<br>(109.23)           | 407.93<br>(88.33)                                         | 349.42<br>(111.80)           |
| Wake after sleep<br>onset (min)             | 49.33<br>(18.85)                                    | 37.18<br>(14.47)             | 30.47<br>(12.16)                                          | 34.06<br>(12.52)             |
| Awakenings (#)                              | 9.97<br>(4.78)                                      | 15.16<br>(7.06)              | 12.89<br>(5.31)                                           | 14.23<br>(5.49)              |
| Avg. awakening<br>Length (min)              | 2.73<br>(0.97)                                      | 2.64<br>(0.67)               | 2.47<br>(0.58)                                            | 2.56<br>(0.71)               |
| Sleep efficiency (%)                        | 87.06<br>(5.71)                                     | 89.74<br>(4.08)              | 92.70<br>(3.38)                                           | 90.22<br>(3.83)              |
| Total counts (#)                            | 21,004.78<br>(7355.67)                              | 18,683.27<br>(6964.99)       | 16,476.95<br>(5190.29)                                    | 17,077.20<br>(5608.85)       |

**Table S2.** Sensor characteristics for Opal, GT9X and GT3X.

| Specification               | Opals           | GT9X                               | GT3X               |
|-----------------------------|-----------------|------------------------------------|--------------------|
| Dimensions                  | 50 × 40 × 14 mm | 4.18 × 3.98 × 1.13 cm (in holster) | 4.6 × 3.3 × 1.5 cm |
| Weight                      | 25 g            | 14 g                               | 19 g               |
| Sample rate                 | 30 Hz           | 30-100 Hz                          | 30-100 Hz          |
| Accelerometer dynamic range | 16 G            | +/- 8G                             | +/- 8G             |
| Data storage                | 8 GB            | 4GB                                | 4GB                |
